# Supplementary material for: Supertetrahedral decametallic Ni(ii) clusters directed by μ6-tris-alkoxides
Source: Royal Society of Chemistry journal article supplement (doi:10.1039/b403876b), 2004-01-01
Supplement: b403876b.doc [file b403876b.doc]

# Electronic Supplementary Information

R. Shaw et al., “Supertetrahedral decametallic Ni(II) clusters…”

Disordered ethanol and benzoate on the Ni6, Ni7, Ni6A edge.
